# Supplementary material for: Carrier-Mediated and Energy-Dependent Uptake and Efflux of Deoxynivalenol in Mammalian Cells
Source: PubMed Central journal article supplement (PMC5517473; doi:10.1038/s41598-017-06199-8), 2017-07-19
Supplement: 41598_2017_6199_MOESM1_ESM.pdf [file 41598_2017_6199_MOESM1_ESM.pdf]

---

# Carrier-Mediated and Energy-Dependent Uptake and Efflux of Deoxynivalenol in Mammalian Cells

**Authors:** Xiaoming Li, Peiqiang Mu, Jikai Wen and Yiqun Deng

## Supplementary Data

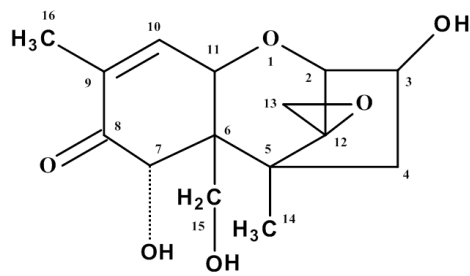

**Supplemental Figure s1.** Chemical structure of Deoxynivalenol (DON)

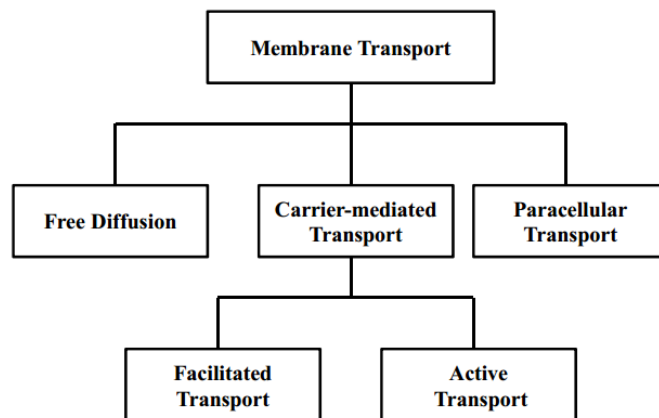

**Supplemental Figure s2.** Possible transport modes of the DON toxin in mammalian cells.

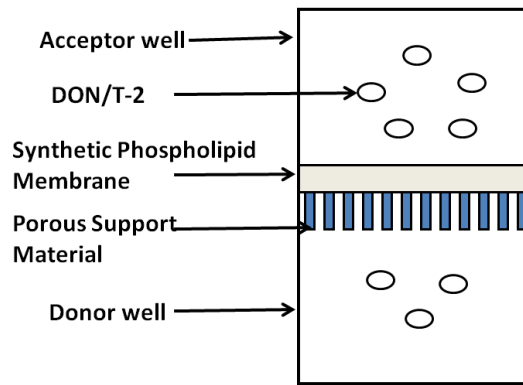

**Supplemental Figure s3.** Parallel Artificial Membrane Permeability (PAMPA) model.

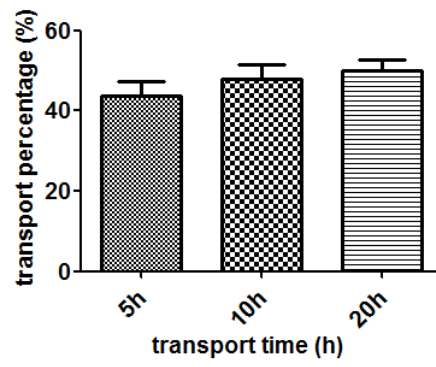

**Supplemental Figure s4.** Percentage of 1 µg/ml T-2 toxin transported in the PAMPA model.

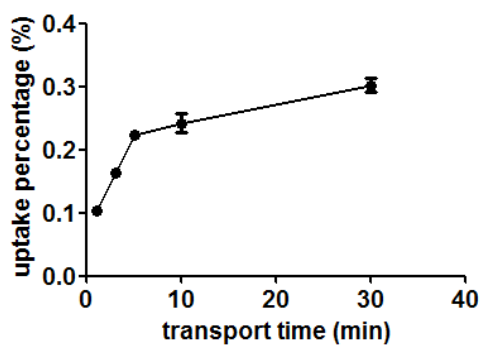

**Supplemental Figure s5.** Percentage of the DON content taken up by the whole cell compared with the total initial DON content in the medium. The initial DON concentration was 5  $\mu\text{g/ml}$ .

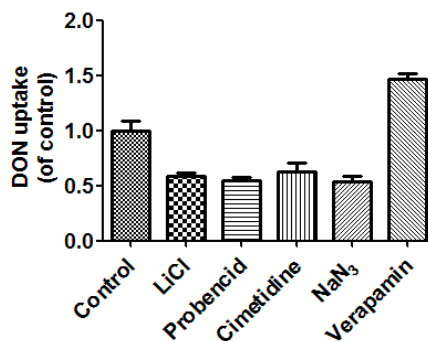

**Supplemental Figure s6.** Effects of various transporter inhibitors on the uptake of 5  $\mu\text{g/ml}$  DON in MDCK cells within 10 min.

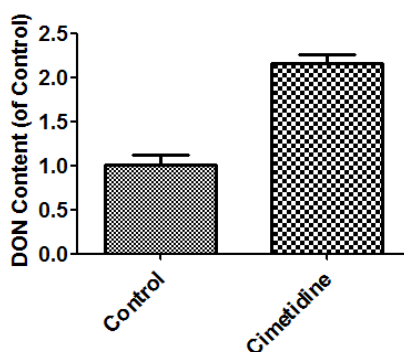

**Supplemental Figure s7.** Effect of multidrug and toxin extrusion proteins (MATE) inhibitor cimetidine on DON efflux from MDCK cells. MDCK cells were pre-incubated with 5  $\mu\text{g/ml}$  DON, and the medium was replaced with HBSS buffer or HBSS buffer containing 2 mM Cimetidine after a 10 min incubation with DON to allow uptake; the DON content in the whole cells was measured after 10 min of efflux.

---

**Supplemental Table s1.** Accuracy and Precision of DON Concentrations Measured using Each Method at 3 Spiking Levels (Mean).

|               | Concentration<br>(ng/ml) | Mean<br>Recoveries<br>SD (%) | RSD (%) |
|---------------|--------------------------|------------------------------|---------|
| HPLC-UV       | 10000                    | 96.1                         | 2.18    |
| Methods       | 1000                     | 90.1                         | 3.55    |
|               | 100                      | 91.3                         | 4.49    |
| ELISA Methods | 50                       | 94.1                         | 3.72    |
|               | 5                        | 92.1                         | 4.56    |
|               | 1                        | 93.1                         | 4.72    |
